# Supplementary material for: A circulating miR-19b-based model in diagnosis of human breast cancer
Source: PubMed Central journal article supplement (PMC9523242; doi:10.3389/fmolb.2022.980841), 2022-09-16

## Supplemental Information

Supplemental Table S2: Characteristics of all subjects used in the study.

Supplemental Table S3: Clinical characteristics of breast cancer patients used in the study.

Supplemental Table S4: Home made cancer-related circulating miRNA panel.

Supplemental Figure S1. The expression levels of the 5 miRNA candidates in 764 luminal subtype and 191 basal-like subtype of breast cancer tumors.

Supplemental Figure S2. Formulas and accuracy information of the 5 models developed by binary logistic regression analysis of the miRNA expression data in the independent validation cohort of 80 BC patients and 30 controls.

Supplemental Figure S3. The expression level of the miR-1246 in 1103 breast cancer tumors and 104 normal controls. NS means none significance.

# Supplemental Table S2

**Table S2 Characteristics of the subjects included in this study**

| <b>Characteristic</b> | <b>Ctrl</b> | <b>BC</b> | <b>PC</b> | <b>TC</b> | <b>CR</b> |
|-----------------------|-------------|-----------|-----------|-----------|-----------|
| Age (Mean±SD)         | 55.0±8.1    | 55.3±12.3 | 66.5±12.7 | 44.2±13.4 | 62.7±14.2 |
| Female/Male           | 50/0        | 120/0     | 0/16      | 9/6       | 13/20     |
| Numbers               | 50          | 120       | 16        | 15        | 33        |

BC: breast cancer, PC: prostate cancer, TC: thyroid cancer, CR: colorectal cancer

# Supplemental Table S3

**Table S3 Clinical characteristics of breast cancer subjects included in this study**

| <b>Characteristic</b> | <b>Number</b> |
|-----------------------|---------------|
| <b><i>Subtype</i></b> |               |
| Luminal A             | 8             |
| Luminal B             | 90            |
| Her2+                 | 20            |
| Basal like            | 2             |
| <b><i>Stage</i></b>   |               |
| I                     | 50            |
| II                    | 50            |
| III+IV                | 20            |

## Supplemental Table S4

Table S4 Home-made cancer-related circulating miRNA panel

|   | 1          | 2        | 3          | 4       | 5        | 6          | 7        | 8       | 9          | 10       | 11         | 12         |
|---|------------|----------|------------|---------|----------|------------|----------|---------|------------|----------|------------|------------|
| A | let-7a     | let-7b   | let-7c     | let-7d  | let-7g   | let-7i     | H2O      | 5s      | miR-16     | H2O      | miR-16     | miR-17-5p  |
| B | mir-18a    | miR-19b  | miR-20a    | miR-20b | miR-21   | miR-23a    | miR-29a  | miR-29b | miR-29c    | miR-30d  | miR-34a    | miR-34b-3p |
| C | miR-34c    | miR-92a  | miR-92b    | miR-99b | miR-100  | miR-105    | miR-106a | miR-122 | miR-127-3p | miR-128a | miR-130b   | miR-139    |
| D | miR-140-3p | miR-145  | miR-151-3p | miR-152 | miR-154  | miR-155    | miR-181a | miR-182 | miR-27     | miR-192  | miR-195    | miR-197    |
| E | miR-200a   | miR-200b | miR-200c   | miR-205 | miR-206  | miR-221    | miR-222  | miR-224 | miR-320a   | miR-320b | miR-320c   | miR-320d   |
| F | miR-320e   | miR-323a | miR-326    | miR-328 | miR-329  | miR-339-3p | miR-345  | miR-346 | miR-370    | miR-375  | miR-409-3p | miR-423-5p |
| G | miR-424    | miR-431  | miR-483    | miR-484 | miR-487b | miR-502-5p | miR-505  | miR-584 | miR-593    | miR-595  | miR-638    | miR-652    |
| H | miR-654    | miR-664a | miR-665    | miR-671 | miR-675  | miR-744    | miR-762  | miR-766 | miR-769    | miR-874  | miR-877    | 5s         |

# Supplemental Figure S1

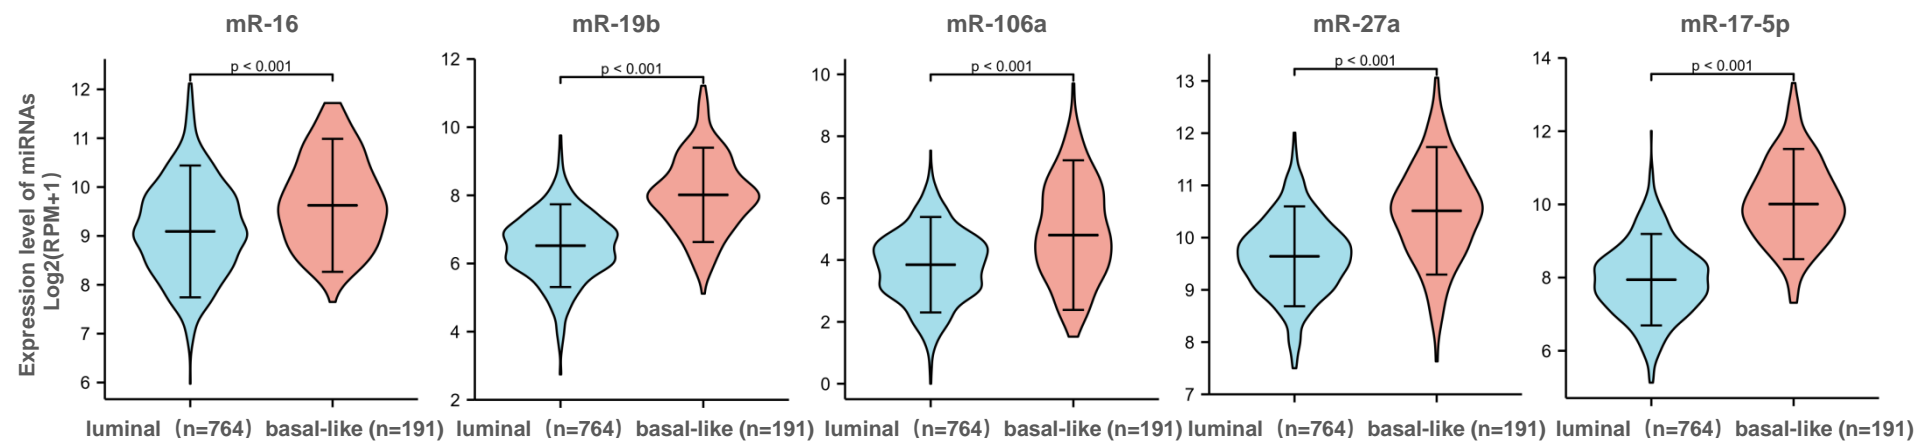

## Supplemental Figure S2

| Model ID | miRNAs                                     | Model formula (Ctrl: Y<0.5, BC: Y>0.5)                                                                                                                                                                                                                                                            | R <sup>2</sup> | Accuracy %                            | AUC   | 95% CI          |
|----------|--------------------------------------------|---------------------------------------------------------------------------------------------------------------------------------------------------------------------------------------------------------------------------------------------------------------------------------------------------|----------------|---------------------------------------|-------|-----------------|
| Model 1  | miR-19b                                    | $\text{EXP}(-4.379+2350.119*\text{miR-19b})/(1+\text{EXP}(-4.379+2350.119*\text{miR-19b}))$                                                                                                                                                                                                       | 0.850          | 94.50%<br>(Ctrl:90.00%,<br>BC:96.30%) | 0.989 | 0.962-<br>1.000 |
| Model 2  | miR-16, miR-19b                            | $\text{EXP}(-7.261+170.324*\text{miR-16}+2901.749*\text{miR-19b})/(1+\text{EXP}(-7.261+170.324*\text{miR-16}+2901.749*\text{miR-19b}))$                                                                                                                                                           | 0.903          | 96.40%<br>(Ctrl:96.70%,<br>BC:96.30%) | 0.993 | 0.981-<br>1.000 |
| Model 3  | miR-16, miR-19b, miR-106a                  | $\text{EXP}(-8.382-1682.454*\text{miR-106a}+579.027*\text{miR-16}+2826.828*\text{miR-19b})/(1+\text{EXP}(-8.382-1682.454*\text{miR-106a}+579.027*\text{miR-16}+2826.828*\text{miR-19b}))$                                                                                                         | 0.931          | 98.20%<br>(Ctrl:96.70%,<br>BC:98.80%) | 0.996 | 0.987-<br>1.000 |
| Model 4  | miR-16, miR-19b, miR-27a, miR-106a         | $\text{EXP}(-10.726-10458.587*\text{miR-106a}+953.866*\text{miR-16}+4405.732*\text{miR-19b}+7783.425*\text{miR-27a})/(1+\text{EXP}(-10.726-10458.587*\text{miR-106a}+953.866*\text{miR-16}+4405.732*\text{miR-19b}+7783.425*\text{miR-27a}))$                                                     | 0.955          | 98.20%<br>(Ctrl:96.70%,<br>BC:98.80%) | 0.998 | 0.993-<br>1.000 |
| Model 5  | miR-16, miR-17, miR-19b, miR-27a, miR-106a | $\text{EXP}(-12.32-12492.123*\text{miR-106a}+931.567*\text{miR-16}+4777.146*\text{miR-17-5p}+5179.302*\text{miR-19b}+10367.007*\text{miR-27a})/(1+\text{EXP}(-12.32-12492.123*\text{miR-106a}+931.567*\text{miR-16}+4777.146*\text{miR-17-5p}+5179.302*\text{miR-19b}+10367.007*\text{miR-27a}))$ | 0.958          | 98.20%<br>(Ctrl:96.70%,<br>BC:98.80%) | 0.999 | 0.996-<br>1.000 |

Ctrl: Normal control; BC: Breast cancer

# Supplemental Figure S3

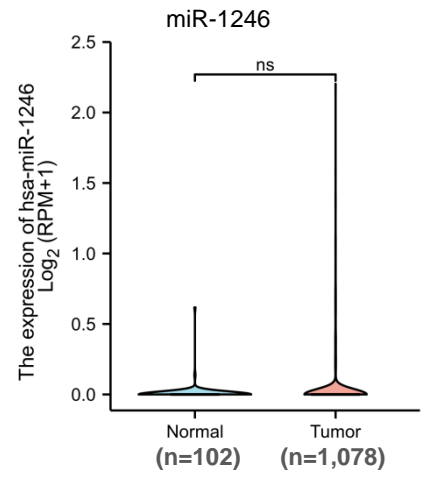

Supplement: DataSheet1.pdf [file DataSheet1.pdf]
